# Supplementary material for: The effect of youths as change agents on cardiovascular disease risk factors among adult neighbours: a cluster randomised controlled trial in Sri Lanka
Source: BMC Public Health. 2019 Jul 8;19:893. doi: 10.1186/s12889-019-7142-1 (PMC6613264; doi:10.1186/s12889-019-7142-1)
Supplement: Supplementary file 2 — Table S2. Effect of intervention on body weight for people with overweight and on blood pressure for people with hypertension. (DOCX 19 kb) [file 12889_2019_7142_MOESM2_ESM.docx]

**Additional file 2**

**Table S2** Effect of intervention on body weight for people with overweight and on blood pressure for people with hypertension

|  | Intervention group | | |  | Control group | | |  | Between-group difference at  follow-up† | |
| --- | --- | --- | --- | --- | --- | --- | --- | --- | --- | --- |
|  | n | Mean ± SD  at the end of the follow-up | Mean ± SD of change from baseline |  | n | Mean ± SD  at the end of the follow-up | Mean ± SD of change from baseline |  | Difference in means (95 % CI) | *p*-value |
| People with overweight‡ |  |  |  |  |  |  |  |  |  |  |
| Body weight (kg) | 114 | 71.1 ± 10.7 | -2.56 ± 3.03 |  | 115 | 72.4 ± 10.8 | 1.19 ± 2.64 |  | -3.69 (-4.48, -2.90) | < 0.001 |
| BMI (kg/m2) | 114 | 28.1 ± 3.3 | -1.04 ± 1.25 |  | 115 | 29.1 ± 3.2 | 0.48 ± 1.11 |  | -1.50 (-1.80, -1.20) | < 0.001 |
| People with hypertension§ |  |  |  |  |  |  |  |  |  |  |
| Blood pressure |  |  |  |  |  |  |  |  |  |  |
| Systolic (mmHg) | 108 | 140.5 ± 17.8 | -2.85 ± 18.0 |  | 110 | 142.3 ± 15.4 | 2.09 ± 17.2 |  | -3.18 (-7.05, 0.68) | 0.11 |
| Diastolic (mmHg) | 108 | 92.0 ± 9.2 | -1.37 ± 12.8 |  | 110 | 93.6 ± 7.1 | -1.37 ± 12.8 |  | -1.90 (-4.33, 0.54) | 0.13 |

BMI body mass index, SD standard deviation, CI confidence interval

Change from baseline = outcome values at the end of the follow-up – outcome values at baseline

†Multilevel linear regression for continuous outcomes and multilevel logistic regression for binary outcomes, with Grama Niladari divisions as the cluster variable and adjustment for each outcome variable at baseline.

‡Overweight was defined BMI ≥ 25 kg/m2.

§Hypertension was defined systolic blood pressure ≥ 140mmHg, diastolic blood pressure ≥ 90 mmHg, or receiving medical treatment for hypertension.
